# Supplementary material for: Strong magnetic resonances and largely enhanced second-harmonic generation of colloidal MoS2 and ReS2@Au nanoantennas with assembled 2D nanosheets
Source: Royal Society of Chemistry journal article supplement (doi:10.1039/c7nr06293a), 2017-11-29
Supplement: c7nr06293a1.pdf [file c7nr06293a1.pdf]

Electronic Supplementary Information for

**Strong magnetic resonances and largely enhanced second-harmonic generation of colloidal MoS<sub>2</sub> and ReS<sub>2</sub>@Au nanoantennas with assembled 2D nanosheets**

*Si-Jing Ding, Zhi-Jun Luo, Ya-Ming Xie, Gui-Ming Pan, Yun-Hang Qiu, Kai Chen, Li Zhou, Jianfang Wang,\* Hai-Qing Lin,\* Qu-Quan Wang\**

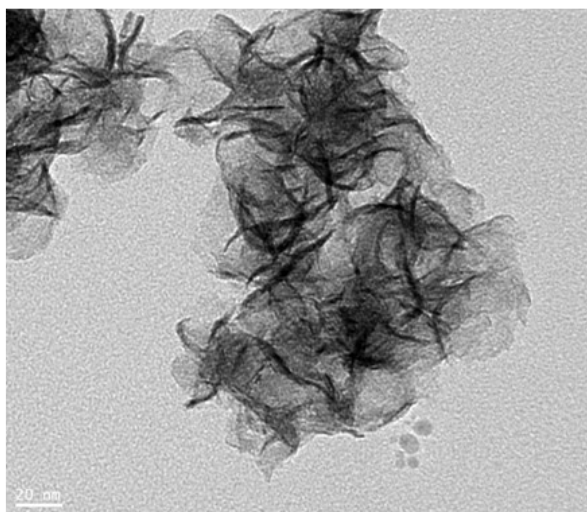

**Figure S1.** TEM image of ReS<sub>2</sub> nanodisks. The average lateral size is ~60 nm.

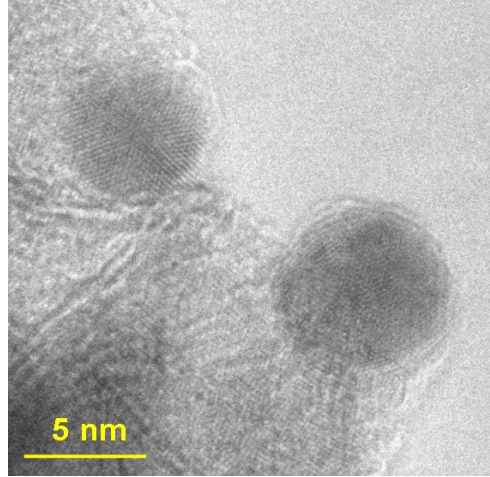

**Figure S2.** HRTEM image of Au nanoparticles growth on the ReS2 nanospheres. The average diameter of Au nanoparticles  $\sim 8$  nm.

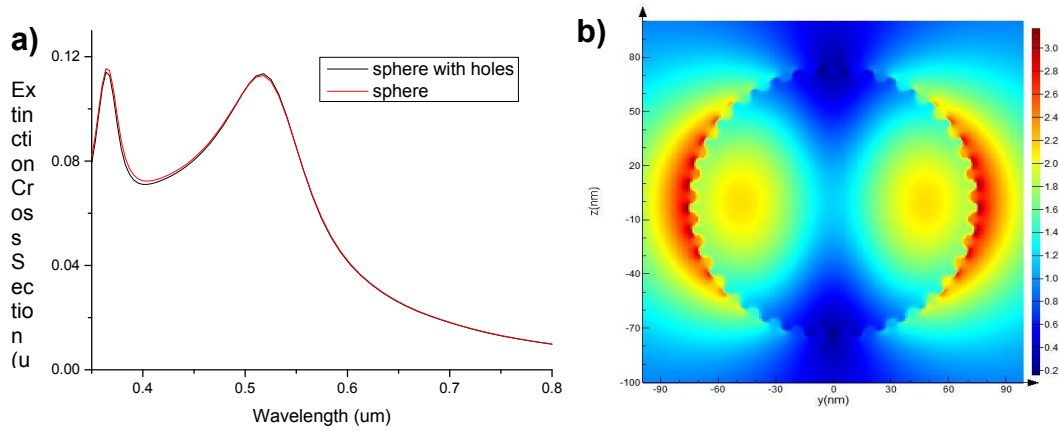

**Figure S3.** **a)** Calculated extinction spectrum of a solid dielectric sphere with and without nanoholes on the surface. **b)** Local field distribution of the dielectric sphere with nanoholes on the surface. The nanoholes on the surface lead to slight increase of dipole resonance and prominent increase of local field on the dielectric surface.
